# Supplementary material
Source: publisher figshare collection journal article supplement (https://rs.figshare.com/ndownloader/files/17842466)
Supplement: Supplementary file 1 [file 17842466]

10	0.01	0.01	-1	1	0.03	0.04	0.4	0	10	1	125.88	0.12291
10	0.1	0.8	-1	1	0.03	0.04	0.4	0.1	10	1	49.751	0.12556
10	0.7	0.9	-1	1	0.03	0.04	0.4	0.2	10	1	102.08	0.10906
10	0.9	0.9	-1	1	0.03	0.04	0.4	0.3	10	1	173.44	0.09541
10	0.99	0.9	-1	1	0.03	0.04	0.4	0.4	10	1	585.25	0.09036
10	0.99	0.9	-1	1	0.03	0.04	0.4	0.5	10	1	581.5	0.09371
10	0.99	0.9	-1	1	0.03	0.04	0.4	0.6	10	1	574.58	0.09573
10	0.99	0.9	-1	1	0.03	0.04	0.4	0.7	10	1	572.73	0.10098
10	0.99	0.9	-1	1	0.03	0.04	0.4	0.8	10	1	566.87	0.10203
10	0.99	0.99	-1	1	0.03	0.04	0.4	0.9	10	1	1538.6	0.10869
